# Supplementary material
Source: PubMed Central journal article supplement (PMC7164796)
Supplement: mmc1.pdf [file mmc1.pdf]

# THE LANCET Infectious Diseases

## Supplementary webappendix

This webappendix formed part of the original submission and has been peer reviewed.  
We post it as supplied by the authors.

Supplement to: Chiu MH, Meatherall B, Nikolic A, et al. Subacute sclerosing panencephalitis in pregnancy. *Lancet Infect Dis* 2016; published online Jan 19.  
[http://dx.doi.org/10.1016/S1473-3099\(15\)00524-1](http://dx.doi.org/10.1016/S1473-3099(15)00524-1).

**Table: Definition of the four clinical stages of SSPE.**

Data from (Garg et al. 2008)<sup>1</sup> and (Gutierrez et al. 2010)<sup>2</sup>

| SSPE Stage | Clinical Manifestations                                                                  |
|------------|------------------------------------------------------------------------------------------|
| Stage 1    | Behavioural Changes and Cognitive Decline                                                |
| Stage 2    | Myoclonus and Motor Deterioration                                                        |
| Stage 3    | Disappearance of Myoclonus and Development of Pyramidal and Extrapyrmidal Manifestations |
| Stage 4    | Vegetative, Comatose Stage and Akinetic Mutism                                           |

1 Garg RK. Subacute sclerosing panencephalitis. J Neurol 2008; 255: 1861–71.

2 Gutierrez J, Issacson RS, Koppel BS. Subacute sclerosing panencephalitis: an update. Dev Med Child Neurol 2010; 52: 901–07.
